# Supplementary material for: The effectiveness of cooling conditions on temperature of canine EDTA whole blood samples
Source: PeerJ. 2016 Nov 29;4:e2732. doi: 10.7717/peerj.2732 (PMC5131627; doi:10.7717/peerj.2732)
Supplement: Supplemental Information 1 — On the X axis is time (0–15 min) for each condition. [file peerj-04-2732-s001.xlsx]

## Sheet: Sheet1
0	37.7	37.7	37.7	37.7	37.7	37.7	37.7	37.7	37.7	37.7	37.7	37.7	37.7	37.7	37.7	37.7	37.7	37.7	37.7	37.7	37.7	37.7	37.7	37.7	37.7	37.7	37.7	37.7	37.7	37.7	37.7
1	19.01	18.31	20.09	19.13	19.47	19.74	18.11	18.25	19.69	18.67	18.34	16.15	18.2	18	18.93	18.03	19.27	18.76	19.08	19.47	18.47	19.37	18.67	21.01	20.11	19.25	20.61	20.01	19.46	20.44	19.07
2	9.75	9.21	11.22	8.89	10.87	11.27	9.88	9.44	10.56	9.51	9.73	7.94	10.06	9.69	10.11	9.16	10.34	9.84	10.28	10.3	9.1	10.18	9.82	11.32	10.71	10.04	11.24	11.14	10.35	10.74	10.0897
3	5.59	4.81	6.25	4.81	6.25	6.41	5.56	5.07	5.81	5.08	5.09	4.11	5.81	5.35	5.54	4.83	5.62	5.36	5.81	5.66	5.03	5.49	5.33	6.31	5.82	5.26	6.31	6.37	5.67	5.62	5.53433
4	3.15	2.58	3.53	2.67	3.61	3.7	3.16	2.8	3.11	2.75	3.02	2.18	3.41	3.02	3.08	2.62	2.95	2.97	3.3	3.18	2.74	3.04	2.95	3.58	3.17	2.73	3.62	3.7	3.26	3.16	3.09133
5	1.82	1.43	2.05	1.52	2.12	2.21	1.84	1.59	1.87	1.53	1.73	1.22	2.04	1.76	1.75	1.46	1.66	1.68	1.95	1.82	1.54	1.73	1.68	2.08	1.79	1.59	2.13	2.19	1.92	1.81	1.78276
6	1.13	0.83	1.23	0.89	1.29	1.36	1.11	0.94	1.11	0.87	1.02	0.71	1.26	1.07	1.03	0.85	1.02	0.99	1.17	1.07	0.88	1.02	0.98	1.26	1.04	0.91	1.31	1.33	1.15	1.06	1.063
7	0.75	0.52	0.78	0.55	0.81	0.88	0.7	0.62	0.67	0.52	0.63	0.44	0.81	0.68	0.64	0.51	0.65	0.61	0.73	0.64	0.55	0.62	0.6	0.79	0.62	0.55	0.84	0.84	0.66	0.65	0.662
8	0.54	0.35	0.52	0.36	0.55	0.59	0.46	0.42	0.44	0.33	0.41	0.29	0.55	0.45	0.41	0.34	0.45	0.39	0.48	0.41	0.37	0.4	0.4	0.53	0.4	0.35	0.56	0.56	0.47	0.42	0.44
9	0.42	0.26	0.38	0.25	0.39	0.42	0.33	0.31	0.31	0.23	0.29	0.21	0.39	0.32	0.29	0.24	0.32	0.27	0.34	0.28	0.26	0.28	0.28	0.37	0.28	0.24	0.4	0.39	0.32	0.3	0.312333
10	0.35	0.21	0.3	0.19	0.3	0.32	0.23	0.26	0.23	0.17	0.22	0.17	0.3	0.25	0.21	0.18	0.26	0.21	0.25	0.21	0.2	0.21	0.22	0.28	0.21	0.19	0.31	0.3	0.25	0.23	0.240667	Significant decrease each minute for how many minutes?
11	0.31	0.18	0.25	0.16	0.25	0.26	0.19	0.23	0.18	0.14	0.18	0.15	0.25	0.2	0.17	0.15	0.21	0.17	0.2	0.17	0.17	0.17	0.18	0.23	0.17	0.15	0.26	0.24	0.2	0.19	0.198667	Significantly faster cooling than ice over how many minutes?
12	0.28	0.17	0.22	0.14	0.21	0.22	0.16	0.21	0.16	0.13	0.16	0.14	0.22	0.18	0.15	0.14	0.19	0.15	0.18	0.15	0.15	0.15	0.17	0.2	0.15	0.14	0.22	0.21	0.18	0.17	0.176667
13	0.26	0.16	0.21	0.13	0.2	0.2	0.14	0.2	0.14	0.12	0.15	0.14	0.2	0.16	0.14	0.13	0.18	0.13	0.16	0.14	0.14	0.13	0.16	0.19	0.14	0.13	0.21	0.19	0.16	0.16	0.163333
14	0.26	0.16	0.21	0.13	0.19	0.18	0.13	0.2	0.14	0.11	0.15	0.14	0.19	0.15	0.13	0.13	0.17	0.13	0.15	0.14	0.13	0.13	0.15	0.18	0.14	0.13	0.2	0.18	0.16	0.15	0.158
15	0.25	0.16	0.2	0.13	0.19	0.18	0.12	0.2	0.13	0.11	0.15	0.14	0.19	0.15	0.12	0.12	0.16	0.12	0.15	0.13	0.13	0.12	0.15	0.18	0.13	0.12	0.19	0.17	0.15	0.15	0.153
	water/ice 40
	37.7	37.7	37.7	37.7	37.7	37.7	37.7	37.7	37.7	37.7	37.7	37.7	37.7	37.7	37.7	37.7	37.7	37.7	37.7	37.7	37.7	37.7	37.7	37.7	37.7	37.7	37.7	37.7	37.7	37.7	37.7
	27.85	29.97	25.16	28.64	26.44	30.32	24.51	24.22	27.9	31.62	29.42	29.69	27.84	24.8	27.89	25.44	26.26	24.92	25.71	29.35	25.25	27.72	27.16	27.15	27.37	28.07	26.78	31.41	30	29.02	27.596
	21.38	25.2	19.17	22.47	20.44	23.55	18.75	16.53	23.04	24.35	22.69	24.33	20.09	17.07	22.65	19.79	22.01	19.62	22.21	24.91	18.2	23.17	22.8	23.19	24	21.47	19.73	26.34	25.11	22.02	21.876
	17.45	20.93	15.44	18.15	16.25	19.23	15.21	12.58	20.02	19.76	17.92	20.43	14.73	12.58	18.68	15.23	18.24	18.18	19.6	21.62	13.92	19.24	19.06	19.87	20.78	16.33	15.43	21.88	21.09	18.14	17.949
	14.78	17.31	12.44	14.77	13.22	15.89	12.67	10.36	17.91	16.25	14.42	17.31	11.7	9.77	15.68	12.48	15.19	16.35	17.39	19.07	11.76	16.73	16.28	17.21	18.37	12.87	12.67	18.13	17.61	15.65	15.0747
	12.37	14.31	9.34	12.1	10.94	13.14	10.33	9.06	16.09	13.32	11.92	14.51	9.64	7.8	13.28	10.83	12.77	14.44	15.31	16.92	9.78	14.54	14	14.9	16.21	10.51	11.01	15.25	14.38	13.46	12.7487
	10.58	11.99	7.2	10.05	9.18	11.06	8.49	7.75	14.44	11.08	10.11	12.04	7.69	6.2	11.46	9.08	10.83	12.81	13.46	15.04	8.19	12.72	12.27	12.98	14.31	8.62	9.62	12.83	11.82	11.7	10.8533
	9.13	10.13	5.63	8.33	7.69	9.37	7.05	6.64	12.71	9.24	8.83	10.09	6.24	4.96	9.95	7.56	9.03	11.37	11.88	13.35	6.92	11.21	10.8	11.35	12.69	6.61	8.38	10.93	9.95	10.17	9.273
	7.94	8.62	4.48	6.91	6.51	7.97	5.91	5.71	11.26	7.72	7.76	8.54	5.17	3.98	8.67	6.37	7.48	10.08	10.54	11.97	5.83	9.9	9.56	10	11.35	5.29	7.42	9.43	8.48	8.85	7.99
	6.94	7.38	3.59	5.88	5.51	6.79	4.98	4.92	10.65	6.52	6.8	7.3	4.17	3.25	7.6	5.42	6.25	8.95	9.36	10.74	4.94	8.77	8.5	8.8	10.2	4.4	6.5	8.14	7.26	7.72	6.941
	6.09	6.33	2.85	5.01	4.7	5.81	4.24	4.25	9.67	5.65	6.04	6.33	3.4	2.66	6.69	4.63	5.24	7.96	8.32	9.53	4.24	7.79	7.58	7.76	9.16	3.75	5.74	7.07	6.22	6.73	6.048
	5.38	5.43	2.32	4.32	3.97	4.98	3.63	3.69	8.8	4.95	5.36	5.53	2.83	2.2	5.91	3.95	4.39	7.1	7.42	8.71	3.65	6.94	6.75	6.88	8.25	3.21	5.07	6.16	5.3	5.85	5.29767
	4.77	4.67	1.9	3.75	3.47	4.29	3.14	3.23	8.02	4.38	4.78	4.88	2.37	1.83	5.26	3.42	3.69	6.36	6.63	7.88	3.15	6.19	6.07	6.12	7.44	2.78	4.5	5.38	4.52	5.08	4.665
	4.24	4.04	1.56	3.29	2.95	3.7	2.73	2.85	7.33	3.95	4.28	4.36	2.02	1.54	4.7	2.92	3.08	5.7	5.91	7.15	2.76	5.54	5.46	5.45	6.72	2.41	4	4.72	3.86	4.4	4.12067
	3.79	3.51	1.29	2.91	2.63	3.21	2.39	2.55	6.71	3.52	3.85	3.91	1.71	1.3	4.23	2.59	2.59	5.14	5.34	6.5	2.43	5.02	4.91	4.87	6.11	2.1	3.57	4.15	3.31	3.8	3.66467
	3.39	3.07	1.08	2.59	2.31	2.79	2.1	2.3	6.16	3.26	3.48	3.53	1.43	1.13	3.82	2.27	2.19	4.64	4.81	5.93	2.15	4.56	4.43	4.36	5.55	1.84	3.21	3.66	2.85	3.28	3.27233
	ice 40
	37.7	37.7	37.7	37.7	37.7	37.7	37.7	37.7	37.7	37.7	37.7	37.7	37.7	37.7	37.7	37.7	37.7	37.7	37.7	37.7	37.7	37.7	37.7	37.7	37.7	37.7	37.7	37.7	37.7	37.7	37.7
	21	28.63	22.78	23.17	27.27	22.43	22.8	23.98	23.55	24.89	25.42	24.5	22.76	23.54	24	24.32	23.05	25.25	22.46	18.02	22.46	25.15	22.08	23.65	26.45	25.35	24.21	28.03	22.23	23.76	23.9063
	19.23	24.74	18.28	18.82	23.69	19.48	19.41	19.15	20.33	19.73	21.16	19.91	17.96	19.21	19.31	20.74	18.55	20.37	18.39	13.8	17.93	20.98	17.46	19	22.75	21.36	18.63	24.55	18.13	19.12	19.739
	16.07	21.46	14.76	15.97	20.72	17.34	15.91	15.3	17.56	15.81	17.73	16.37	14.63	15.47	15.7	17.6	15.27	16.65	15.53	10.71	14.59	17.32	15.01	15.91	19.31	17.74	14.43	21.44	14.27	15.78	16.412
	13.25	18.75	12.06	13.03	18.15	15.28	13	12.37	15.2	13.78	14.9	13.39	12.38	12.4	13.22	15.07	12.95	13.8	12.98	8.19	11.91	14.54	12.95	13.12	16.32	14.74	11.23	18.74	11.79	13.16	13.755
	11.18	16.51	10.05	10.88	15.97	13.52	10.78	10.05	13.2	10.87	12.68	11.1	10.62	10.26	11.38	13.17	11.07	11.8	10.9	6.79	9.96	12.26	11.17	10.96	14.08	12.54	8.96	16.52	10.15	11.13	11.6837
	9.48	14.53	8.39	9.23	13.99	12.11	8.97	8.25	11.62	9.05	10.97	9.27	9.23	8.74	9.88	11.64	9.29	10.22	9.24	5.57	8.35	10.44	9.82	9.19	11.85	10.98	7.13	14.55	8.96	8.85	9.993
	8.02	12.85	7.03	7.88	12.53	10.88	7.49	7.02	10.27	7.51	9.58	7.85	8	7.61	8.6	10.42	7.52	8.89	7.91	4.61	7.01	8.93	8.54	7.74	10.01	9.7	5.79	12.85	7.98	8.04	8.63533
	6.8	11.43	5.92	6.7	11.23	9.81	6.3	6.01	9.11	6.27	8.42	6.8	6.99	6.72	7.48	9.35	6.16	7.77	6.91	3.82	5.88	7.63	7.53	6.57	8.57	8.6	4.85	11.42	7.18	6.98	7.507
	5.78	10.18	5.01	5.67	10.11	8.86	5.36	5.18	8.12	5.23	7.44	5.98	6.15	5.98	6.52	8.41	5.11	6.82	6.09	3.19	4.91	6.63	6.66	5.51	7.38	7.64	4.16	10.14	6.45	5.99	6.55533
	4.84	9.06	4.25	4.83	9.13	8.03	4.61	4.51	7.26	4.36	6.6	5.29	5.41	5.32	5.71	7.59	4.26	6.01	5.38	2.67	4.11	5.78	5.87	4.67	6.37	6.81	3.58	8.94	5.8	5.09	5.738
	4.11	8.02	3.62	4.14	8.29	7.3	4.02	3.95	6.52	3.67	5.89	4.71	4.78	4.79	5.01	6.87	3.58	5.31	4.79	2.26	3.47	5.07	5.23	3.97	5.52	6.07	3.08	7.8	5.21	4.43	5.04933
	3.52	7.12	3.01	3.53	7.52	6.66	3.54	3.48	5.87	3.1	5.27	4.21	4.24	4.32	4.43	6.24	3.02	4.71	4.28	1.92	2.95	4.46	4.64	3.39	4.72	5.38	2.66	6.82	4.7	3.7	4.447
	3.05	6.31	2.54	3.05	6.82	6.08	3.14	3.09	5.3	2.66	4.74	3.77	3.8	3.9	3.94	5.7	2.55	4.2	3.85	1.66	2.51	4	4.16	2.95	4.15	4.73	2.3	5.99	4.23	3.15	3.944
	2.65	5.61	2.17	2.67	6.17	5.58	2.81	2.76	4.81	2.25	4.28	3.39	3.41	3.55	3.5	5.22	2.21	3.76	3.48	1.43	2.16	3.59	3.73	2.59	3.6	4.19	2	5.28	3.81	2.77	3.51433
	2.32	5.02	1.86	2.3	5.57	5.13	2.52	2.47	4.39	1.95	3.89	3.05	3.1	3.24	3.11	4.79	1.93	3.38	3.15	1.26	1.88	3.24	3.36	2.28	3.14	3.69	1.75	4.66	3.43	2.41	3.14233
	Prechilled 40%
	37.7	37.7	37.7	37.7	37.7	37.7	37.7	37.7	37.7	37.7	37.7	37.7	37.7	37.7	37.7	37.7	37.7	37.7	37.7	37.7	37.7	37.7	37.7	37.7	37.7	37.7	37.7	37.7	37.7	37.7	37.7
	17.56	17.26	17.23	17.32	15.57	16.75	17.67	18.41	17.64	17.16	18.28	16.44	17.45	16.37	17.8	17.83	17.8	16.97	17.67	17.64	18.24	18.35	17.87	17.87	17.99	17.8	17.22	17.32	18.57	17.8	17.5283
	9.17	9.02	9.07	9.55	8.57	8.91	9.26	8.97	9.19	8.81	9.53	8.21	8.87	8.13	9.31	9.51	9.21	8.31	8.87	9.63	9.65	10.41	9.56	8.67	9.59	9.41	9.64	9.57	11	10.16	9.25867
	5.32	5.11	5.09	5.59	4.98	5.05	5.09	4.57	5.18	4.93	5.34	4.41	5.49	4.31	5.26	5.42	5.09	4.47	4.95	5.54	5.42	6.17	5.6	5.11	5.48	5.44	5.63	5.37	6.51	5.93	5.26167
	3.23	2.98	2.95	3.35	2.98	2.96	2.86	2.43	3.02	2.88	3.12	2.51	3.31	2.42	3.08	3.19	2.87	2.48	2.89	3.24	3.12	3.75	3.29	2.97	3.24	3.16	3.36	3.1	3.94	3.51	3.073
	2	1.8	1.76	2.08	1.83	1.79	1.68	1.31	1.78	1.71	1.88	1.49	2.03	1.42	1.83	1.91	1.65	1.5	1.74	1.94	1.83	2.34	1.95	1.69	1.95	1.84	2	1.82	2.43	2.12	1.83667
	1.27	1.1	1.09	1.31	1.16	1.12	1.03	0.72	1.07	1.04	1.18	0.91	1.28	0.86	1.11	1.17	0.97	0.9	1.03	1.17	1.09	1.49	1.19	1.01	1.18	1.09	1.23	1.08	1.53	1.31	1.123
	0.83	0.69	0.7	0.85	0.76	0.73	0.66	0.43	0.67	0.65	0.78	0.57	0.83	0.54	0.69	0.73	0.58	0.56	0.65	0.73	0.67	0.98	0.73	0.61	0.73	0.66	0.77	0.64	1	0.84	0.708667
	0.56	0.45	0.47	0.57	0.53	0.51	0.44	0.27	0.44	0.42	0.54	0.39	0.57	0.35	0.44	0.47	0.36	0.37	0.43	0.47	0.42	0.66	0.47	0.39	0.46	0.41	0.5	0.43	0.67	0.56	0.467333
	0.41	0.32	0.33	0.41	0.39	0.37	0.32	0.19	0.31	0.29	0.39	0.28	0.41	0.24	0.3	0.32	0.24	0.26	0.3	0.32	0.28	0.47	0.31	0.26	0.31	0.27	0.34	0.29	0.47	0.39	0.326333
	0.32	0.24	0.25	0.31	0.3	0.29	0.25	0.15	0.24	0.22	0.33	0.22	0.31	0.18	0.22	0.23	0.17	0.19	0.22	0.24	0.2	0.35	0.22	0.19	0.22	0.19	0.24	0.21	0.35	0.29	0.244667
	0.27	0.19	0.21	0.24	0.25	0.24	0.2	0.13	0.2	0.18	0.28	0.19	0.26	0.15	0.18	0.18	0.13	0.16	0.18	0.19	0.16	0.28	0.17	0.14	0.17	0.14	0.19	0.16	0.28	0.23	0.197667
	0.24	0.17	0.18	0.21	0.23	0.21	0.18	0.11	0.17	0.15	0.27	0.16	0.22	0.13	0.15	0.14	0.11	0.14	0.15	0.17	0.13	0.24	0.14	0.12	0.14	0.12	0.16	0.14	0.23	0.19	0.17
	0.22	0.16	0.16	0.18	0.21	0.19	0.17	0.11	0.16	0.14	0.26	0.15	0.21	0.12	0.14	0.13	0.1	0.13	0.14	0.15	0.12	0.21	0.12	0.11	0.12	0.11	0.14	0.12	0.21	0.17	0.155333
	0.21	0.15	0.15	0.17	0.2	0.18	0.16	0.11	0.15	0.13	0.26	0.14	0.2	0.11	0.13	0.12	0.09	0.12	0.13	0.15	0.11	0.2	0.11	0.1	0.11	0.1	0.13	0.12	0.19	0.16	0.146333
	0.21	0.14	0.14	0.16	0.18	0.18	0.16	0.1	0.15	0.13	0.26	0.14	0.2	0.11	0.13	0.11	0.09	0.12	0.13	0.15	0.11	0.2	0.11	0.1	0.11	0.1	0.12	0.11	0.18	0.15	0.142667
	icewater 20
	37.7	37.7	37.7	37.7	37.7	37.7	37.7	37.7	37.7	37.7	37.7	37.7	37.7	37.7	37.7	37.7	37.7	37.7	37.7	37.7	37.7	37.7	37.7	37.7	37.7	37.7	37.7	37.7	37.7	37.7	37.7
	28.4	29.58	29.2	25.79	26.02	28.75	27.56	26.73	29.03	28.31	24.53	23.19	26.49	27.88	26.63	27.92	27.22	28.71	27.08	27.38	30.08	27.67	27.17	26.63	28.33	27.02	29.24	28.64	30.5	30.51	27.7397
	22.5	24.57	23.76	19.35	19.25	23.54	21.72	20.34	23.83	22.52	18.67	17.2	19.16	22.15	20.57	21.61	22.54	23.46	21.04	22.53	25.25	19.73	20.7	19.73	22.58	22.48	23	23.02	25.36	26.03	21.9397
	18.46	21.14	19.6	15.58	15.07	19.98	17.56	16.94	20.16	18.76	15.04	13.21	15.05	17.89	16.73	16.85	20.21	19.73	17.49	18.69	21.8	16.64	18.42	16.71	21.4	19.25	18.54	19.51	21.35	22.64	18.3467
	15.61	18.38	16.53	12.81	12.14	17.36	14.87	14.43	17.22	15.8	13.08	10.6	12.51	12.78	13.75	13.8	17.64	16.23	14.84	15.11	18.99	14.76	16.58	14.37	18.78	16.27	15.18	16.99	18.02	19.7	15.5043
	13.3	16.09	13.91	10.68	10.11	15.21	12.65	12.47	14.59	13.6	11.36	9.78	10.34	11.05	11.35	11.55	15.34	13.62	12.95	12.32	16.7	13.12	14.92	12.23	16.6	14.03	12.31	14.81	12.27	17.44	13.2233
	11.52	14.12	11.97	9.06	8.52	13.35	10.8	10.95	12.4	11.32	9.88	8.08	8.61	8.6	9.43	9.71	13.96	11.54	11.39	9.95	14.73	11.73	13.41	10.44	14.63	12.25	10.4	12.99	10.82	15.43	11.3997
	10.02	12.48	10.39	7.77	7.23	11.81	9.27	9.62	10.71	9.89	8.59	6.75	7.22	6.72	7.92	8.11	12.29	9.82	10.05	8.18	13.08	10.46	12.05	9.02	13.17	10.77	8.61	11.52	9.1	13.63	9.875
	8.73	11.09	9.12	6.74	6.17	10.5	7.96	8.54	9.3	8.73	7.58	5.65	6.16	5.38	6.78	6.87	11.12	8.37	8.91	6.83	11.72	9.34	10.86	7.88	11.78	9.47	7.1	10.52	7.25	12.13	8.61933
	7.64	9.88	8.12	5.91	5.28	9.32	6.85	7.57	8.08	7.77	6.69	4.77	5.25	4.39	5.82	5.83	10.06	7.15	7.94	5.81	10.53	8.35	9.77	6.89	10.59	8.33	5.97	9.15	6.13	10.45	7.543
	6.7	8.82	7.25	5.18	4.53	8.29	5.89	6.79	7.09	6.93	5.93	4.11	4.51	3.67	5.01	4.96	9.09	6.15	7.09	4.95	9.47	7.46	8.79	6.02	9.51	7.36	5.01	8.18	5.15	9.72	6.65367
	5.9	7.9	6.49	4.57	3.9	7.39	5.09	6.08	6.24	6.2	5.26	3.6	3.89	3.38	4.32	4.24	8.21	5.3	6.35	4.24	8.41	6.69	7.95	5.27	8.54	6.49	4.14	7.31	4.31	8.7	5.87867
	5.22	7.09	5.84	4.05	3.37	6.6	4.39	5.45	5.52	5.56	4.69	3.16	3.37	3.06	3.75	3.62	7.42	4.59	5.7	3.65	7.75	6.02	7.2	4.62	7.65	5.75	3.54	6.54	3.67	7.77	5.22033
	4.64	6.37	5.3	3.59	2.92	5.91	3.79	4.91	4.91	5	4.2	2.81	2.94	2.77	3.27	3.13	6.73	3.99	5.13	3.16	7	5.42	6.54	4.05	6.93	5.09	3	5.85	3.12	6.99	4.64867
	4.13	5.38	4.83	3.17	2.58	5.31	3.29	4.45	4.4	4.5	3.77	2.53	2.57	2.5	2.86	2.56	6.13	3.5	4.63	2.77	6.36	4.91	5.95	3.59	6.27	4.54	2.56	5.13	2.66	6.31	4.138
	3.68	4.5	4.4	2.82	2.27	4.78	2.86	4.03	3.94	4.07	3.39	2.29	2.27	2.26	2.52	2.07	5.57	3.07	4.19	2.45	5.79	4.44	5.43	3.2	5.67	4.05	2.2	4.6	2.28	5.69	3.69267
	ice 20%
	37.7	37.7	37.7	37.7	37.7	37.7	37.7	37.7	37.7	37.7	37.7	37.7	37.7	37.7	37.7	37.7	37.7	37.7	37.7	37.7	37.7	37.7	37.7	37.7	37.7	37.7	37.7	37.7	37.7	37.7	37.7
	24.09	25.08	23.74	22.84	22.99	22.14	23.28	22.11	22.46	21.31	24.12	22	20.53	24.45	21.01	21.2	22.02	25.02	22.36	22.41	22.92	23.96	22.48	22.68	20.06	21.23	20.7	24.68	23.48	19.67	22.5673
	20.39	21.76	20.06	18.27	19.36	17.97	19.1	16.65	16.14	17.05	20.41	17.94	13.96	20.14	16.84	14.93	17.09	18.84	18.24	18.33	18.25	19.2	19.05	18.29	14.1	15.4	15.72	20.75	19.19	13.47	17.8963
	17.31	18.99	17.08	14.7	16.4	14.52	15.59	13.28	13.22	13.95	17.53	14.55	9.99	17.02	14.15	11.28	13.55	15.88	15.5	15.21	14.79	15.5	16.45	15.42	10.73	11.26	12.1	17.46	16.23	10.63	14.6757
	14.47	16.71	14.47	12.01	14	12.16	12.83	10.95	11.2	11.4	15.31	12	7.48	14.61	12.79	8.6	10.97	12.78	13.51	12.8	12.1	12.24	14.32	13.27	8.75	8.48	9.53	14.79	13.84	8.41	12.226
	12.02	14.72	12.25	10.1	12.23	10.38	10.69	9.14	9.46	9.59	13.43	10.1	5.75	12.79	11.47	6.78	8.98	10.42	11.88	10.89	10.09	9.76	12.7	11.45	7.27	6.5	7.58	12.95	12.08	6.62	10.3357
	10.67	13	10.6	8.44	10.76	9.03	9.01	7.71	8.29	8.14	11.97	8.56	4.96	11.37	10.24	5.29	7.49	8.61	10.48	9.35	8.44	7.92	11.33	9.82	6.12	5.14	6.09	11.21	10.63	5.21	8.86267
	9.3	11.57	9.1	6.97	9.51	7.91	7.67	6.43	7.26	6.93	10.72	7.3	4.3	10.16	9.16	4.11	6.35	7.16	9.26	8.12	7.14	6.58	10.16	8.56	5.27	4.14	4.96	9.95	9.4	3.99	7.648
	8.2	10.3	7.81	5.77	8.44	6.97	6.59	5.21	6.27	6.02	9.62	6.21	3.76	9.11	8.21	3.24	5.43	5.99	8.24	7.13	6.02	5.5	9.11	7.48	4.6	3.41	4.05	8.72	8.36	3.11	6.62933
	7.29	9.15	6.69	4.82	7.55	6.17	5.66	4.29	5.39	5.22	8.64	5.32	3.27	8.2	7.35	2.51	4.65	5.04	7.33	6.3	5.14	4.6	8.17	6.52	4.05	2.86	3.36	7.75	7.46	2.52	5.77567
	6.5	8.11	5.74	4.06	6.78	5.49	4.92	3.57	4.62	4.55	7.78	4.48	2.88	7.41	6.65	2.01	4	4.27	6.52	5.59	4.38	3.87	7.38	5.75	3.59	2.44	2.79	6.92	6.68	2.07	5.06
	5.82	7.2	4.93	3.46	6.1	4.9	4.3	2.99	3.98	3.98	7.01	3.88	2.54	6.71	6.01	1.62	3.45	3.64	5.79	4.97	3.77	3.32	6.68	5.03	3.2	2.12	2.39	6.15	6	1.71	4.455
	5.24	6.39	4.2	2.98	5.52	4.38	3.78	2.53	3.41	3.51	6.33	3.43	2.24	6.1	5.45	1.31	2.97	3.13	5.14	4.43	3.26	2.85	6.07	4.43	2.87	1.86	2.06	5.45	5.4	1.43	3.93833
	4.73	5.68	3.67	2.58	5.03	3.93	3.34	2.16	2.93	3.1	5.73	3.07	2	5.56	4.94	1.08	2.58	2.69	4.56	3.97	2.83	2.51	5.51	3.91	2.6	1.65	1.79	4.83	4.87	1.22	3.50167
	4.29	5.07	3.22	2.26	4.6	3.54	2.96	1.85	2.32	2.76	5.19	2.82	1.8	5.05	4.5	0.9	2.25	2.33	4.07	3.57	2.51	2.17	5.02	3.46	2.37	1.48	1.57	4.31	4.41	1.05	3.12333
	3.89	4.52	2.86	1.99	4.22	3.2	2.63	1.62	1.85	2.46	4.72	2.59	1.62	4.59	4.11	0.77	1.97	2.01	3.57	3.24	2.23	1.96	4.59	3.07	2.16	1.33	1.39	3.86	4	0.91	2.79767
	Prechilled 20%
	time	icewtr 40	ice 40	prechil 40	icewtr 20	ice 20	prechil 20
	0	37.7	37.7	37.7	37.7	37.7	37.7
	1	19.07	27.596	23.9063	17.5283	27.7397	22.5673
	2	10.8967	21.876	19.739	9.25867	21.9397	17.8963
	3	5.53433	17.949	16.412	5.26167	18.3467	14.6757
	4	3.09133	15.0747	13.755	3.073	15.5043	12.226
	5	1.78276	12.7487	11.6837	1.83667	13.2233	10.3357
	6	1.063	10.8533	9.993	1.123	11.3997	8.86293
	7	0.662	9.273	8.63533	0.708667	9.875	7.648
	8	0.44	7.99	7.507	0.467333	8.61933	6.62933
	9	0.312333	6.941	6.55533	0.326333	7.543	5.77567
	10	0.240667	6.048	5.738	0.244667	6.65367	5.06
	11	0.198667	5.29767	5.04933	0.197667	5.87867	4.455
	12	0.176667	4.665	4.447	0.17	5.22033	3.98333
	13	0.163333	4.12067	3.944	0.155333	4.64867	3.50167
	14	0.158	3.66467	3.51433	0.146333	4.138	3.12333
	15	0.153	3.27233	3.14233	0.142667	3.69267	2.79767
